# Supplementary material for: Trends in outpatient antibiotic use and prescribing practice among US older adults, 2011-15: observational study
Source: PubMed Central journal article supplement — BMJ. 2018 Jul 27;362:k3155. doi: 10.1136/bmj.k3155 (PMC6062849; doi:10.1136/bmj.k3155), 2018-07-27
Supplement: oles044260.ww.pdf [file oles044260.ww.pdf]

## Appendix

Olesen SW, Barnett ML, MacFadden DR, *et al.* Trends in outpatient antibiotic prescribing practice among US older adults, 2011-2015: an observational study.

**Appendix Table 1.** Dosage form codes for oral and injected drugs.

**Appendix Table 2.** Antibiotic generic names.

**Appendix Table 3.** Number of beneficiaries meeting each inclusion criterion.

**Appendix Table 4.** Trends in study population characteristics.

**Appendix Table 5.** Patterns and trends in overall antibiotic use by demography and geography.

**Appendix Table 6.** Trends in use of azithromycin, levofloxacin, and amoxicillin/clavulanate for respiratory conditions, linking each claim with only one diagnosis.

**Appendix Table 7.** Trends in use of ciprofloxacin, metronidazole, and levofloxacin for gastrointestinal conditions.

**Appendix Table 8.** Trends in use of ciprofloxacin, nitrofurantoin, and trimethoprim/sulfamethoxazole for genitourinary conditions.

**Appendix Table 9.** Trends in use of cephalexin, trimethoprim/sulfamethoxazole, and ciprofloxacin for skin, cutaneous, and mucosal conditions.

**Appendix Table 1.** Dosage form codes for oral and injected drugs. Part D Events were filtered for oral and injected drugs using the values in this table.

| <b>Dosage code</b> | <b>Dosage form</b>                       |
|--------------------|------------------------------------------|
| CA                 | CAPSULE                                  |
| CE                 | CAPSULE,DELAYED RELEASE (ENTERIC COATED) |
| CJ                 | CAPSULE,EXTENDED RELEASE MULTIPHASE 24HR |
| HH                 | AMPUL (ML)                               |
| HK                 | IV SOLUTION, PIGGYBACK PREMIX FROZEN(ML) |
| HM                 | INTRAVENOUS SOLUTION                     |
| HP                 | INTRAVENOUS SOLUTION, PIGGYBACK (ML)     |
| HQ                 | DISPOSABLE SYRINGE (ML)                  |
| HQ                 | SYRINGE (ML)                             |
| HS                 | VIAL (SDV,MDV OR ADDITIVE) (EA)          |
| HS                 | VIAL (EA)                                |
| HV                 | VIAL (SDV,MDV OR ADDITIVE) (ML)          |
| HV                 | VIAL (ML)                                |
| IF                 | VIAL WITH THREADED PORT (EA)             |
| IG                 | VIAL WITH THREADED PORT (ML)             |
| IM                 | CAPSULE,IMMEDIATE, DELAY RELEASE,BIPHASE |
| PD                 | SUSPENSION, RECONSTITUTED, ORAL (ML)     |
| PI                 | SOLUTION, RECONSTITUTED, ORAL            |
| PP                 | PACKET (EA)                              |
| QI                 | SUSPENSION, EXTENDED RELEASE, RECONST.   |
| RG                 | SUSPENSION, MICROCAPSULE RECONSTITUTED   |
| RH                 | DROPS, VISCOUS (ML)                      |
| SC                 | SUSPENSION, ORAL (FINAL DOSE FORM)       |
| SJ                 | SOLUTION, ORAL                           |
| ST                 | SYRUP                                    |
| TA                 | TABLET                                   |
| TC                 | TABLET, CHEWABLE                         |
| TE                 | TABLET, DELAYED RELEASE (ENTERIC COATED) |
| TM                 | TABLET, EXTENDED RELEASE 12 HR           |
| TS                 | TABLET, EXTENDED RELEASE                 |
| UP                 | TABLET,EXTENDED RELEASE MULTIPHASE 24 HR |
| ZD                 | COMBINATION PACKAGE (EA)                 |

**Appendix Table 2.** Antibiotic generic names. Part D Events were filtered for antibiotics using the generic names in this table.

| <b>Generic name</b>            | <b>Antibiotic</b>          |
|--------------------------------|----------------------------|
| AMIKACIN SULFATE               | amikacin                   |
| AMOXICILLIN                    | amoxicillin                |
| AMOXICILLIN/POTASSIUM CLAV     | amoxicillin/clavulanate    |
| AMPICILLIN SODIUM              | ampicillin                 |
| AMPICILLIN SODIUM/SULBACTAM NA | ampicillin                 |
| AMPICILLIN TRIHYDRATE          | ampicillin                 |
| AZITHROMYCIN                   | azithromycin               |
| AZTREONAM                      | aztreonam                  |
| AZTREONAM LYSINE               | aztreonam                  |
| AZTREONAM/DEXTROSE-WATER       | aztreonam                  |
| BACITRACIN                     | bacitracin                 |
| BACITRACIN/POLYMYXIN B SULFATE | bacitracin                 |
| BEDAQUILINE FUMARATE           | bedaquiline                |
| BESIFLOXACIN HCL               | besifloxacin               |
| BESIFLOXACIN HYDROCHLORIDE     | besifloxacin               |
| BISMUTH SAL/METRONID/TETRACYC  | metronidazole/tetracycline |
| BISMUTH/METRONID/TETRACYCLINE  | metronidazole/tetracycline |
| CAPREOMYCIN SULFATE            | capreomycin                |
| CEFACTOR                       | cefaclor                   |
| CEFADROXIL                     | cefadroxil                 |
| CEFADROXIL HYDRATE             | cefadroxil                 |
| CEFAZOLIN SODIUM               | cefazolin                  |
| CEFAZOLIN SODIUM/DEXTROSE,ISO  | cefazolin                  |
| CEFDINIR                       | cefdinir                   |
| CEFDITOREN PIVOXIL             | cefditoren                 |
| CEFEPIME HCL                   | cefepime                   |
| CEFIXIME                       | cefixime                   |
| CEFOTAXIME SODIUM              | cefotaxime                 |
| CEFOTETAN DISODIUM             | cefotetan                  |
| CEFOXITIN SODIUM               | cefoxitin                  |
| CEFOXITIN SODIUM/DEXTROSE,ISO  | cefoxitin                  |
| CEFPODOXIME PROXETIL           | cefpodoxime                |
| CEFPROZIL                      | cefprozil                  |
| CEFTAROLINE FOSAMIL ACETATE    | ceftaroline                |
| CEFTAZIDIME                    | ceftazidime                |
| CEFTAZIDIME IN DEXTROSE5%WATER | ceftazidime                |
| CEFTAZIDIME NA/DEXTROSE,ISO    | ceftazidime                |
| CEFTAZIDIME PENTAHYDRATE       | ceftazidime                |
| CEFTAZIDIME PENTAHYDRATE/D5W   | ceftazidime                |
| CEFTIBUTEN DIHYDRATE           | ceftibuten                 |
| CEFTRIAXONE SODIUM             | ceftriaxone                |
| CEFUROXIME AXETIL              | cefuroxime                 |

|                                |                            |
|--------------------------------|----------------------------|
| CEFUROXIME SODIUM              | cefuroxime                 |
| CEFUROXIME SODIUM/DEXTROSE,ISO | cefuroxime                 |
| CEFUROXIME SODIUM/WATER        | cefuroxime                 |
| CEPHALEXIN                     | cephalexin                 |
| CHLORAMPHENICOL NA SUCC        | chloramphenicol            |
| CHLORAMPHENICOL SOD SUCC       | chloramphenicol            |
| CHLORHEXIDINE GLUCONATE        | chlorhexidine              |
| CIPROFLOXACIN                  | ciprofloxacin              |
| CIPROFLOXACIN HCL              | ciprofloxacin              |
| CIPROFLOXACIN HCL/DEXAMETH     | ciprofloxacin              |
| CIPROFLOXACIN LACTATE          | ciprofloxacin              |
| CIPROFLOXACIN LACTATE/D5W      | ciprofloxacin              |
| CIPROFLOXACIN/CIPROFLOXA HCL   | ciprofloxacin              |
| CIPROFLOXACIN/HYDROCORTISONE   | ciprofloxacin              |
| CLARITHROMYCIN                 | clarithromycin             |
| CLINDAMYCIN HCL                | clindamycin                |
| CLINDAMYCIN PALMITATE HCL      | clindamycin                |
| CLINDAMYCIN PHOS/BENZOYL PEROX | clindamycin                |
| CLINDAMYCIN PHOS/SKIN CLNSR 19 | clindamycin                |
| CLINDAMYCIN PHOSPHATE          | clindamycin                |
| CLINDAMYCIN PHOSPHATE/D5W      | clindamycin                |
| CLINDAMYCIN/BENZ PER/HYALUR NA | clindamycin                |
| CLINDAMYCIN/TRETINOIN          | clindamycin                |
| COLISTIN (COLISTIMETHATE NA)   | colistin                   |
| CYCLOSERINE                    | cycloserine                |
| DAPTOMYCIN                     | daptomycin                 |
| DEMECLOCYCLINE HCL             | demeclocycline             |
| DICLOXACILLIN SODIUM           | dicloxacillin              |
| DORIPENEM                      | doripenem                  |
| DOXYCYCLINE CALCIUM            | doxycycline                |
| DOXYCYCLINE HYCLATE            | doxycycline                |
| DOXYCYCLINE MONOHYDRATE        | doxycycline                |
| ERTAPENEM SODIUM               | ertapenem                  |
| ERY E-SUCC/SULFISOXAZOLE       | erythromycin/sulfisoxazole |
| ERYTHROMYCIN BASE              | erythromycin               |
| ERYTHROMYCIN BASE/ETHANOL      | erythromycin               |
| ERYTHROMYCIN ETHYLSUCCINATE    | erythromycin               |
| ERYTHROMYCIN LACTOBIONATE      | erythromycin               |
| ERYTHROMYCIN STEARATE          | erythromycin               |
| ERYTHROMYCIN/BENZOYL PEROXIDE  | erythromycin               |
| ETHAMBUTOL HCL                 | ethambutol                 |
| ETHIONAMIDE                    | ethionamide                |
| FIDAXOMICIN                    | fidaxomicin                |
| FOSFOMYCIN TROMETHAMINE        | fosfomicin                 |
| GATIFLOXACIN                   | gatifloxacin               |

|                                 |                                 |
|---------------------------------|---------------------------------|
| GEMIFLOXACIN MESYLATE           | gemifloxacin                    |
| GENTAMICIN IN NAACL, ISO-OSM    | gentamicin                      |
| GENTAMICIN SULFATE              | gentamicin                      |
| GENTAMICIN SULFATE/PF           | gentamicin                      |
| GENTAMICIN/PREDNISOL AC         | gentamicin                      |
| IMIPENEM/CILASTATIN SODIUM      | imipenem                        |
| ISONIAZID                       | isoniazid                       |
| KANAMYCIN SULFATE               | kanamycin                       |
| LANSOPRAZOLE/AMOXICILN/CLARITH  | clarithromycin/amoxicillin      |
| LEVOFLOXACIN                    | levofloxacin                    |
| LEVOFLOXACIN/D5W                | levofloxacin                    |
| LEVOFLOXACIN/DEXTROSE 5%-WATER  | levofloxacin                    |
| LINCOMYCIN HCL                  | lincomycin                      |
| LINEZOLID                       | linezolid                       |
| MEROPENEM                       | meropenem                       |
| METRONIDAZOLE                   | metronidazole                   |
| METRONIDAZOLE/SODIUM CHLORIDE   | metronidazole                   |
| MINOCYCLINE HCL                 | minocycline                     |
| MINOCYCLINE HCL/SKIN CL NO.4    | minocycline                     |
| MOXIFLOXACIN HCL                | moxifloxacin                    |
| MOXIFLOXACIN IN NAACL (ISO-OSM) | moxifloxacin                    |
| NAFCILLIN IN DEXTROSE,ISO-OSM   | nafcillin                       |
| NAFCILLIN SODIUM                | nafcillin                       |
| NAFCILLIN SODIUM/D2.4W          | nafcillin                       |
| NEO/POLYMYX B SULF/DEXAMETH     | neomycin/polymyxin B            |
| NEOMY SULF/BACITRA/POLYMYXIN B  | neomycin/bacitracin/polymyxin B |
| NEOMY SULF/BACITRAC ZN/POLY/HC  | neomycin/bacitracin/polymyxin B |
| NEOMY SULF/COLIST SUL/HC/THONZ  | neomycin/colistin               |
| NEOMY SULF/POLYMYX B SULF/PRED  | neomycin/polymyxin B            |
| NEOMY SULF/POLYMYXIN B SULFATE  | neomycin/polymyxin B            |
| NEOMYCIN SULFATE                | neomycin                        |
| NEOMYCIN SULFATE/FLUOCINOLONE   | neomycin                        |
| NEOMYCIN/BACITRA/POLYMYXIN/HC   | neomycin/bacitracin/polymyxin B |
| NEOMYCIN/POLYMYXIN B SULF/HC    | neomycin/polymyxin B            |
| NEOMYCIN/POLYMYXIN B/GRAMICIDIN | neomycin/polymyxin B            |
| NITROFURANTOIN                  | nitrofurantoin                  |
| NITROFURANTOIN MACROCRYSTAL     | nitrofurantoin                  |
| NITROFURANTOIN MONOHYD/M-CRYST  | nitrofurantoin                  |
| NORFLOXACIN                     | norfloxacin                     |
| OFLOXACIN                       | ofloxacin                       |
| OMEPRAZOLE/CLARITH/AMOXICILLIN  | clarithromycin/amoxicillin      |
| OXACILLIN SODIUM                | oxacillin                       |
| OXACILLIN SODIUM/DEXTROSE,ISO   | oxacillin                       |
| PAROMOMYCIN SULFATE             | paromomycin                     |
| PEN G BENZ/PEN G PROCAINE       | penicillin G                    |

|                                |                                 |
|--------------------------------|---------------------------------|
| PEN G POT/DEXTROSE-WATER       | penicillin G                    |
| PENICILLIN G BENZATHINE        | penicillin G                    |
| PENICILLIN G POTASSIUM         | penicillin G                    |
| PENICILLIN G PROCAINE          | penicillin G                    |
| PENICILLIN G SODIUM            | penicillin G                    |
| PENICILLIN V POTASSIUM         | penicillin V                    |
| PIPERACILLIN SODIUM            | piperacillin                    |
| PIPERACILLIN SODIUM/TAZOBACTAM | piperacillin/tazobactam         |
| PIPERACILLIN-TAZO-DEXTROSE,ISO | piperacillin/tazobactam         |
| POLYMYXIN B SULF/TRIMETHOPRIM  | polymyxin B/trimethoprim        |
| POLYMYXIN B SULFATE            | polymyxin B                     |
| POLYMYXIN B SULFATE/TMP        | polymyxin B/trimethoprim        |
| PYRAZINAMIDE                   | pyrazinamide                    |
| QUINUPRISTIN/DALFOPRISTIN      | quinupristin/dalfopristin       |
| RETAPAMULIN                    | retapamulin                     |
| RIFABUTIN                      | rifabutin                       |
| RIFAMP/ISONIAZID/PYRAZINAMIDE  | rifampin/isoniazid/pyrazinamide |
| RIFAMPIN                       | rifampin                        |
| RIFAMPIN/ISONIAZID             | rifampin/isoniazid              |
| RIFAMPIN/ISONIAZID/PYRAZINAMID | rifampin/isoniazid/pyrazinamide |
| RIFAPENTINE                    | rifapentine                     |
| RIFAXIMIN                      | rifaximin                       |
| STREPTOMYCIN SULFATE           | streptomycin                    |
| SULFACETAMIDE SODIUM           | sulfacetamide                   |
| SULFACETAMIDE/PREDNISOLONE SP  | sulfacetamide                   |
| SULFACETM NA/PREDNISOL AC      | sulfacetamide                   |
| SULFADIAZINE                   | sulfadiazine                    |
| SULFAMETHOXAZOLE/TRIMETHOPRIM  | trimethoprim/sulfamethoxazole   |
| TEDIZOLID PHOSPHATE            | tedizolid                       |
| TELAVANCIN HCL                 | telavancin                      |
| TELITHROMYCIN                  | telithromycin                   |
| TETRACYCLINE HCL               | tetracycline                    |
| TICARCILLIN/K CLAVULANATE      | ticarcillin/clavulanate         |
| TIGECYCLINE                    | tigecycline                     |
| TINIDAZOLE                     | tinidazole                      |
| TOBRAMYCIN                     | tobramycin                      |
| TOBRAMYCIN IN 0.225% NA CL     | tobramycin                      |
| TOBRAMYCIN SULF/DEXAMETHASONE  | tobramycin                      |
| TOBRAMYCIN SULFATE             | tobramycin                      |
| TOBRAMYCIN/DEXAMETHASONE       | tobramycin                      |
| TOBRAMYCIN/LOTEPRED ETAB       | tobramycin                      |
| TOBRAMYCIN/SODIUM CHLORIDE     | tobramycin                      |
| TRIMETHOPRIM                   | trimethoprim                    |
| VANCOMYCIN HCL                 | vancomycin                      |

**Appendix Table 3.** Number of beneficiaries meeting each inclusion criterion. Increase in size of the study population (bottom row) is due to an increase in the size of the overall Medicare population (top row), increasing age of the Medicare population, and increasing number of beneficiaries of full-year coverage for Parts A, B, and D.

| Criterion                     | No. eligible beneficiaries (% retained from previous step) |                  |                  |                  |                  |
|-------------------------------|------------------------------------------------------------|------------------|------------------|------------------|------------------|
|                               | 2011                                                       | 2012             | 2013             | 2014             | 2015             |
| 20% sample <sup>a</sup>       | 10,341,350 (ref)                                           | 10,707,986 (ref) | 11,053,790 (ref) | 11,550,386 (ref) | 12,365,119 (ref) |
| Age ≥65                       | 7,998,700 (77.3)                                           | 8,251,542 (77.1) | 8,577,277 (77.6) | 9,030,236 (78.2) | 9,777,278 (79.1) |
| Parts A, B, D <sup>b</sup>    | 2,435,965 (30.5)                                           | 2,581,773 (31.3) | 2,997,160 (34.9) | 3,144,145 (34.8) | 3,431,090 (35.1) |
| Demographic data <sup>c</sup> | 2,429,554 (99.7)                                           | 2,575,367 (99.8) | 2,990,851 (99.8) | 3,136,990 (99.8) | 3,425,194 (99.8) |

a: Beneficiaries in the 20% sample provided by Medicare

b: 12 months of eligibility for all three Parts

c: Sex is coded as male or female, and state of residence code matches one of the 50 states or District of Columbia

**Appendix Table 4.** Trends in study population characteristics.

| <b>Population characteristic</b> | <b>Relative trend*, % (95% CI)</b> |
|----------------------------------|------------------------------------|
| Age (%)                          |                                    |
| 65-74                            | 5.01 (4.85 to 5.17)                |
| 75-84                            | -5.14 (-5.33 to -4.94)             |
| 85-94                            | -4.04 (-4.37 to -3.71)             |
| ≥95                              | 0.81 (-0.33 to 1.97)               |
| Mean no. chronic conditions      | -0.038 (-0.127 to 0.050)           |
| % female                         | -1.10 (-1.21 to -0.98)             |
| % white                          | 2.68 (2.61 to 2.75)                |
| % dual eligible for Medicaid     | -34.5 (-34.6 to -34.3)             |
| Region                           |                                    |
| % South                          | -1.94 (-2.12 to -1.75)             |
| % Midwest                        | -2.98 (-3.23 to -2.72)             |
| % West                           | -0.35 (-0.66 to -0.03)             |
| % Northeast                      | 8.19 (7.87 to 8.52)                |

\*: 2011-2015 change from Poisson regression (for first 3 characteristics) or log-binomial regression (for proportions) on population characteristic.



**Appendix Table 5.** Patterns and trends in overall antibiotic use by demography and geography.

|           | <b>Claims per 1,000 beneficiaries per year</b> |             |                                     |
|-----------|------------------------------------------------|-------------|-------------------------------------|
|           | <b>2011</b>                                    | <b>2015</b> | <b>Relative change*, % (95% CI)</b> |
| Overall   | 1365                                           | 1364        | -0.20 (-0.30 to -0.09)              |
| Age       |                                                |             |                                     |
| 65-74     | 1296                                           | 1277        | -1.05 (-1.23 to -0.86)              |
| 75-84     | 1386                                           | 1410        | 1.05 (0.83 to 1.26)                 |
| 85-94     | 1498                                           | 1519        | -0.02 (-0.33 to -0.28)              |
| ≥95       | 1622                                           | 1608        | -3.3 (-4.2 to -2.5)                 |
| Sex       |                                                |             |                                     |
| female    | 1469                                           | 1475        | 0.78 (0.62 to 0.93)                 |
| male      | 1187                                           | 1179        | -2.4 (-2.6 to -2.2)                 |
| Race      |                                                |             |                                     |
| white     | 1407                                           | 1416        | 0.42 (0.28 to 0.56)                 |
| Hispanic  | 1275                                           | 1224        | -2.8 (-3.3 to -2.2)                 |
| other     | 1230                                           | 1106        | -5.5 (-6.1 to -4.9)                 |
| black     | 1074                                           | 1023        | -3.6 (-4.1 to -3.0)                 |
| Region    |                                                |             |                                     |
| South     | 1487                                           | 1519        | 0.80 (0.60 to 0.99)                 |
| Midwest   | 1351                                           | 1335        | -1.5 (-1.8 to -1.3)                 |
| West      | 1266                                           | 1203        | -4.4 (-4.7 to -4.1)                 |
| Northeast | 1218                                           | 1246        | 2.9 (2.6 to 3.2)                    |

\*: Adjusted value for 2011-2015 change from Poisson regression on claims per beneficiary per year adjusted for dual eligibility, number of chronic conditions, and (depending on subpopulation) age, sex, race, and US Census region.

**Appendix Table 6.** Trends in use of azithromycin, levofloxacin, and amoxicillin/clavulanate for respiratory conditions, linking each claim with only one diagnosis.

|                                |                                       | Claims per 1,000 beneficiaries per year <sup>a</sup> |      |                                  |              |      |                                  |                         |      |                                  |
|--------------------------------|---------------------------------------|------------------------------------------------------|------|----------------------------------|--------------|------|----------------------------------|-------------------------|------|----------------------------------|
|                                |                                       | Azithromycin                                         |      |                                  | Levofloxacin |      |                                  | Amoxicillin/clavulanate |      |                                  |
| Diagnosis                      | Antibiotics appropriate? <sup>b</sup> | 2011                                                 | 2014 | Relative change <sup>c</sup> (%) | 2011         | 2014 | Relative change <sup>c</sup> (%) | 2011                    | 2014 | Relative change <sup>c</sup> (%) |
| Pneumonia <sup>d</sup>         | Yes                                   | 5.9                                                  | 4.7  | -17.1 ± 1.9                      | 7.8          | 10.0 | 30.9 ± 2.2                       | 2.2                     | 2.1  | -0.4 ± 3.5                       |
| Sinusitis                      | Potentially                           | 21.9                                                 | 17.7 | -22.7 ± 0.9                      | 4.1          | 7.7  | 69.1 ± 3.5                       | 11.3                    | 15.6 | 35.9 ± 2.0                       |
| VURI <sup>e</sup>              | No                                    | 39.6                                                 | 34.0 | -14.2 ± 0.8                      | 9.2          | 13.9 | 52.8 ± 2.3                       | 6.2                     | 8.0  | 32.0 ± 2.6                       |
| Acute bronchitis <sup>f</sup>  | No                                    | 38.2                                                 | 29.3 | -23.0 ± 0.7                      | 8.2          | 12.6 | 49.1 ± 2.3                       | 5.2                     | 5.8  | 13.3 ± 2.5                       |
| Other respiratory <sup>g</sup> | No                                    | 29.2                                                 | 23.6 | -16.5 ± 0.9                      | 20.6         | 25.7 | 30.1 ± 1.4                       | 9.9                     | 10.3 | 9.4 ± 1.8                        |
| Asthma & allergy <sup>h</sup>  | No                                    | 11.0                                                 | 9.4  | -15.1 ± 1.4                      | 3.2          | 4.7  | 44.0 ± 3.6                       | 2.9                     | 3.6  | 28.0 ± 3.7                       |

a: Includes claims for each antibiotic linked to the given diagnosis. In this analysis, if a single claim was eligible to be linked to multiple diagnoses, it was linked with only one diagnosis selected at random.

b: Appropriateness of antibiotics for that diagnosis as determined by the CDC working group (see Methods)

c: Adjusted value for 2011-2014 change from Poisson regression on claims per beneficiary per year adjusted for age, sex, race, census region, dual eligibility, and number of chronic conditions. Plus-minus contains 95% confidence interval.

d: Includes *Streptococcus pneumoniae* pneumonia, other bacterial pneumonia, pneumonia due to other specified organism, pneumonia in infectious diseases classified elsewhere, bronchopneumonia with organism unspecified, pneumonia with organism unspecified

e: Includes acute nasopharyngitis, acute laryngitis and tracheitis, acute upper respiratory infections of multiple or unspecified sites, and cough

f: Includes bronchitis not specified as acute or chronic, acute bronchitis and bronchiolitis

g: Includes chronic bronchitis, dyspnea, stridor, hemoptysis, and abnormal sputum

h: Includes allergic rhinitis and unspecified allergy

**Appendix Table 7.** Trends in use of ciprofloxacin, metronidazole, and levofloxacin for gastrointestinal conditions.

|                               |                                       | Claims per 1,000 beneficiaries per year <sup>a</sup> |      |                                  |               |      |                                  |              |      |                                  |
|-------------------------------|---------------------------------------|------------------------------------------------------|------|----------------------------------|---------------|------|----------------------------------|--------------|------|----------------------------------|
|                               |                                       | Ciprofloxacin                                        |      |                                  | Metronidazole |      |                                  | Levofloxacin |      |                                  |
| Diagnosis                     | Antibiotics appropriate? <sup>b</sup> | 2011                                                 | 2014 | Relative change <sup>c</sup> (%) | 2011          | 2014 | Relative change <sup>c</sup> (%) | 2011         | 2014 | Relative change <sup>c</sup> (%) |
| Infection <sup>d</sup>        | Potentially                           | 36.4                                                 | 32.9 | -6.5 ± 0.9                       | 29.7          | 27.6 | -4.9 ± 0.9                       | 16.8         | 19.5 | 20.3 ± 1.5                       |
| Other conditions <sup>e</sup> | No                                    | 42.9                                                 | 39.9 | -4.0 ± 0.8                       | 29.3          | 28.6 | -0.8 ± 1.0                       | 23.6         | 29.0 | 27.1 ± 1.3                       |

a: Includes claims for each antibiotic linked to the given diagnosis. A single claim may be linked to multiple diagnoses, so the sum of the “2011” and “2014” columns exceeds the number of claims associated with any listed diagnosis (see main text Methods).

b: Appropriateness of antibiotics for that diagnosis as determined by the CDC working group (see main text Methods)

c: Adjusted value for 2011-2014 change from Poisson regression on claims per beneficiary per year adjusted for age, sex, race, census region, dual eligibility, and number of chronic conditions. Plus-minus contains 95% confidence interval.

d: Includes intestinal infectious diseases, symptoms involving the abdomen or digestive system

e: Includes other conditions of the digestive system

**Appendix Table 8.** Trends in use of ciprofloxacin, trimethoprim/sulfamethoxazole, and nitrofurantoin for genitourinary conditions.

|                               |                                       | Claims per 1,000 beneficiaries per year <sup>a</sup> |      |                                  |         |      |                                  |                |      |                                  |
|-------------------------------|---------------------------------------|------------------------------------------------------|------|----------------------------------|---------|------|----------------------------------|----------------|------|----------------------------------|
|                               |                                       | Ciprofloxacin                                        |      |                                  | TMP/SMX |      |                                  | Nitrofurantoin |      |                                  |
| Diagnosis                     | Antibiotics appropriate? <sup>b</sup> | 2011                                                 | 2014 | Relative change <sup>c</sup> (%) | 2011    | 2014 | Relative change <sup>c</sup> (%) | 2011           | 2014 | Relative change <sup>c</sup> (%) |
| Infection <sup>d</sup>        | Yes                                   | 92.9                                                 | 83.2 | -6.4 ± 0.6                       | 40.6    | 37.2 | -2.4 ± 0.8                       | 44.8           | 38.3 | -7.0 ± 0.8                       |
| Other conditions <sup>e</sup> | No                                    | 76.9                                                 | 73.8 | -3.0 ± 0.6                       | 30.1    | 30.6 | 4.8 ± 1.0                        | 24.1           | 22.0 | -2.3 ± 1.1                       |

a: Includes claims for each antibiotic linked to the given diagnosis. A single claim may be linked to multiple diagnoses, so the sum of the “2011” and “2014” columns exceeds the number of claims associated with any listed diagnosis (see main text Methods).

b: Appropriateness of antibiotics for that diagnosis as determined by the CDC working group (see main text Methods)

c: Adjusted value for 2011-2014 change from Poisson regression on claims per beneficiary per year adjusted for age, sex, race, census region, dual eligibility, and number of chronic conditions. Plus-minus contains 95% confidence interval.

d: Includes acute pyelonephritis, renal abscess, other pyelonephritis/pyelonephrosis, unspecified kidney infection, acute cystitis, unspecified cystitis, and unspecified UTI

e: Includes other symptoms involving urinary system, including dysuria

**Appendix Table 9.** Trends in use of cephalexin, trimethoprim/sulfamethoxazole, and ciprofloxacin for skin, cutaneous and mucosal conditions.

|                               |                                       | Claims per 1,000 beneficiaries per year <sup>a</sup> |      |                                  |         |      |                                  |               |      |                                  |
|-------------------------------|---------------------------------------|------------------------------------------------------|------|----------------------------------|---------|------|----------------------------------|---------------|------|----------------------------------|
|                               |                                       | Cephalexin                                           |      |                                  | TMP/SMX |      |                                  | Ciprofloxacin |      |                                  |
| Diagnosis                     | Antibiotics appropriate? <sup>b</sup> | 2011                                                 | 2014 | Relative change <sup>c</sup> (%) | 2011    | 2014 | Relative change <sup>c</sup> (%) | 2011          | 2014 | Relative change <sup>c</sup> (%) |
| Infection <sup>d</sup>        | Potentially                           | 31.7                                                 | 31.9 | 3.5 ± 1.0                        | 22.5    | 22.1 | 2.1 ± 1.1                        | 12.5          | 10.2 | -15.0 ± 1.3                      |
| Other conditions <sup>e</sup> | No                                    | 44.2                                                 | 46.6 | 7.4 ± 0.9                        | 27.5    | 27.8 | 6.3 ± 1.1                        | 34.5          | 31.9 | -3.9 ± 0.9                       |

a: Includes claims for each antibiotic linked to the given diagnosis. A single claim may be linked to multiple diagnoses, so the sum of the “2011” and “2014” columns exceeds the number of claims associated with any listed diagnosis (see main text Methods).

b: Appropriateness of antibiotics for that diagnosis as determined by the CDC working group (see main text Methods)

c: Adjusted value for 2011-2014 change from Poisson regression on claims per beneficiary per year adjusted for age, sex, race, census region, dual eligibility, and number of chronic conditions. Plus-minus contains 95% confidence interval.

d Includes cellulitis, carbuncle/furuncle, impetigo, lymphadenitis, erysipelas, dermatophytosis, folliculitis, myositis, mastitis, necrotizing fasciitis, and infective otitis externa

e: Includes inflammatory and other skin conditions, open wounds, superficial injuries, burns, diseases of the eye/adnexa, ear diseases other than otitis media and mastoiditis, symptoms of skin/integumentary tissues excluding acne, gangrene, and enlargement of lymph node
